# Supplementary material for: The Interpersonal Dimension of Pandemic Fear and the Dual-Factor Model of Mental Health: The Role of Coping Strategies
Source: MDPI journal article supplement (doi:10.3390/healthcare10020247), 2022-01-27
Supplement: s1 [file s1]

## Online Supplementary Material

### The COVID-19 related fears scale

The following statements describe a series of thoughts and feelings that might normally arise as a result of the COVID-19 pandemic. Please read each item carefully and indicate the extent to which you have experienced the following during the last couple of weeks on the given scale where 1 = not at all; 2 = a little a bit; 3 = moderately; 4 = a lot; 5 = very much.

|    |                                                                                                                    |                          |                          |                          |                          |                          |
|----|--------------------------------------------------------------------------------------------------------------------|--------------------------|--------------------------|--------------------------|--------------------------|--------------------------|
|    |                                                                                                                    |                          |                          |                          |                          |                          |
| 1  | I am scared about the physical manifestation of symptoms related to COVID-19 virus.                                | <input type="checkbox"/> |
| 2  | I fear I might get infected with COVID-19.                                                                         | <input type="checkbox"/> |
| 3  | I fear that my relatives might get infected with COVID-19.                                                         | <input type="checkbox"/> |
| 4  | The idea that I might infect other people concerns me.                                                             | <input type="checkbox"/> |
| 5  | I fear not being able to obtain medical care because of overloaded healthcare facilities.                          | <input type="checkbox"/> |
| 6  | I fear my close relatives not being able to obtain medical healthcare because of overloaded healthcare facilities. | <input type="checkbox"/> |
| 7  | I am worried about the pandemic's progress.                                                                        | <input type="checkbox"/> |
| 8  | I am afraid I will be isolated from my close relatives if I contract the virus.                                    | <input type="checkbox"/> |
| 9  | I am afraid I will not be able to look after my close relatives if they contract the virus.                        | <input type="checkbox"/> |
| 10 | I am worried about the future if the pandemic persists.                                                            | <input type="checkbox"/> |
| 11 | I am worried about the duration of quarantine.                                                                     | <input type="checkbox"/> |
| 12 | I am worried about my physical and emotional state if the quarantine period is prolonged.                          | <input type="checkbox"/> |
| 13 | I am worried about the physical and emotional state of my close relatives if the quarantine period is prolonged.   | <input type="checkbox"/> |
| 14 | I am worried about mine or my family member's employment situation if the quarantine period is prolonged.          | <input type="checkbox"/> |
| 15 | I am concerned about the lack of physical interaction with friends and colleagues.                                 | <input type="checkbox"/> |
